# Supplementary material for: Systematic Insights into Cost-Efficient Biomass and Pigment Production of Limnospira maxima (spirulina) under Varied LED Spectra and Intensities
Source: Research Square preprint supplement (doi:10.21203/rs.3.rs-7640111/v1), 2025-10-18

**Supplementary 1**

The spectra of individual LED’s provided by the manufacturer (Everfine Corporation, China):

Daylight white (DW):


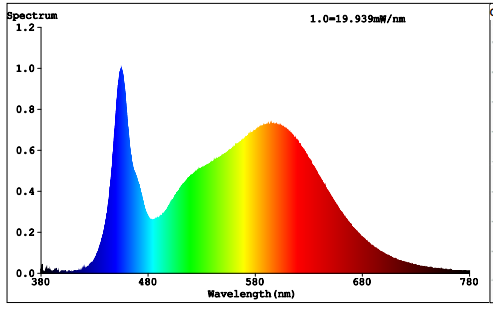


Warm white (WW):


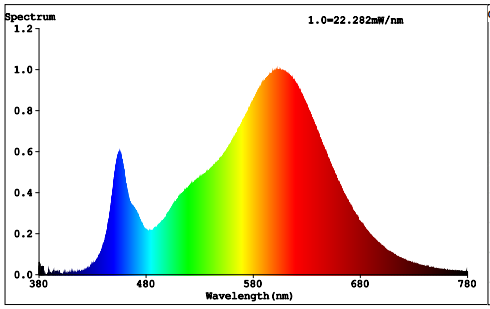


Red (R):


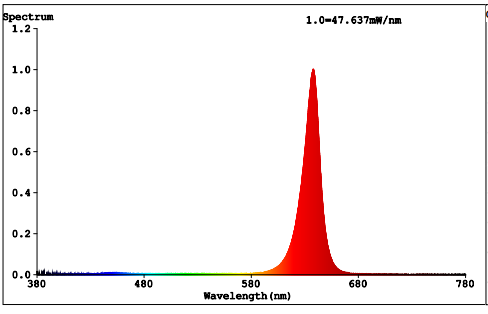


Yellow (Y):


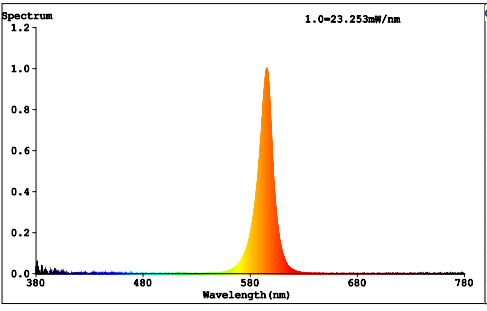


Green (G):


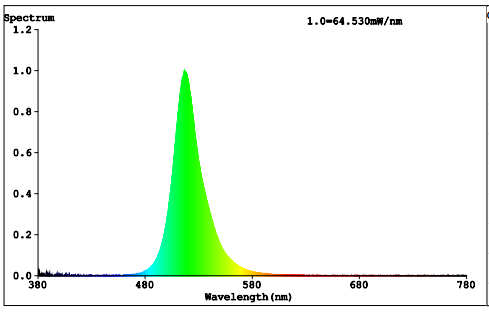


Blue (B):


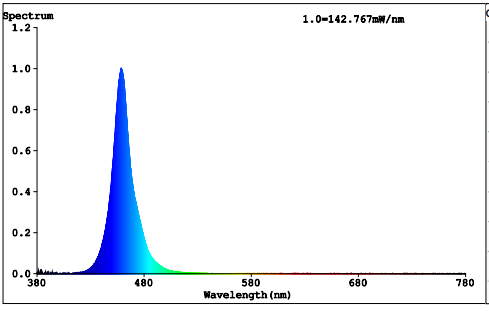

Supplement: Supplementary file 1 [file fb9bea9a559e1ae643e0a86d.docx]
